# Supplementary material for: New N-Alkylated Heterocyclic Compounds as Prospective NDM1 Inhibitors: Investigation of In Vitro and In Silico Properties
Source: MDPI journal article supplement (doi:10.3390/ph15070803), 2022-06-28

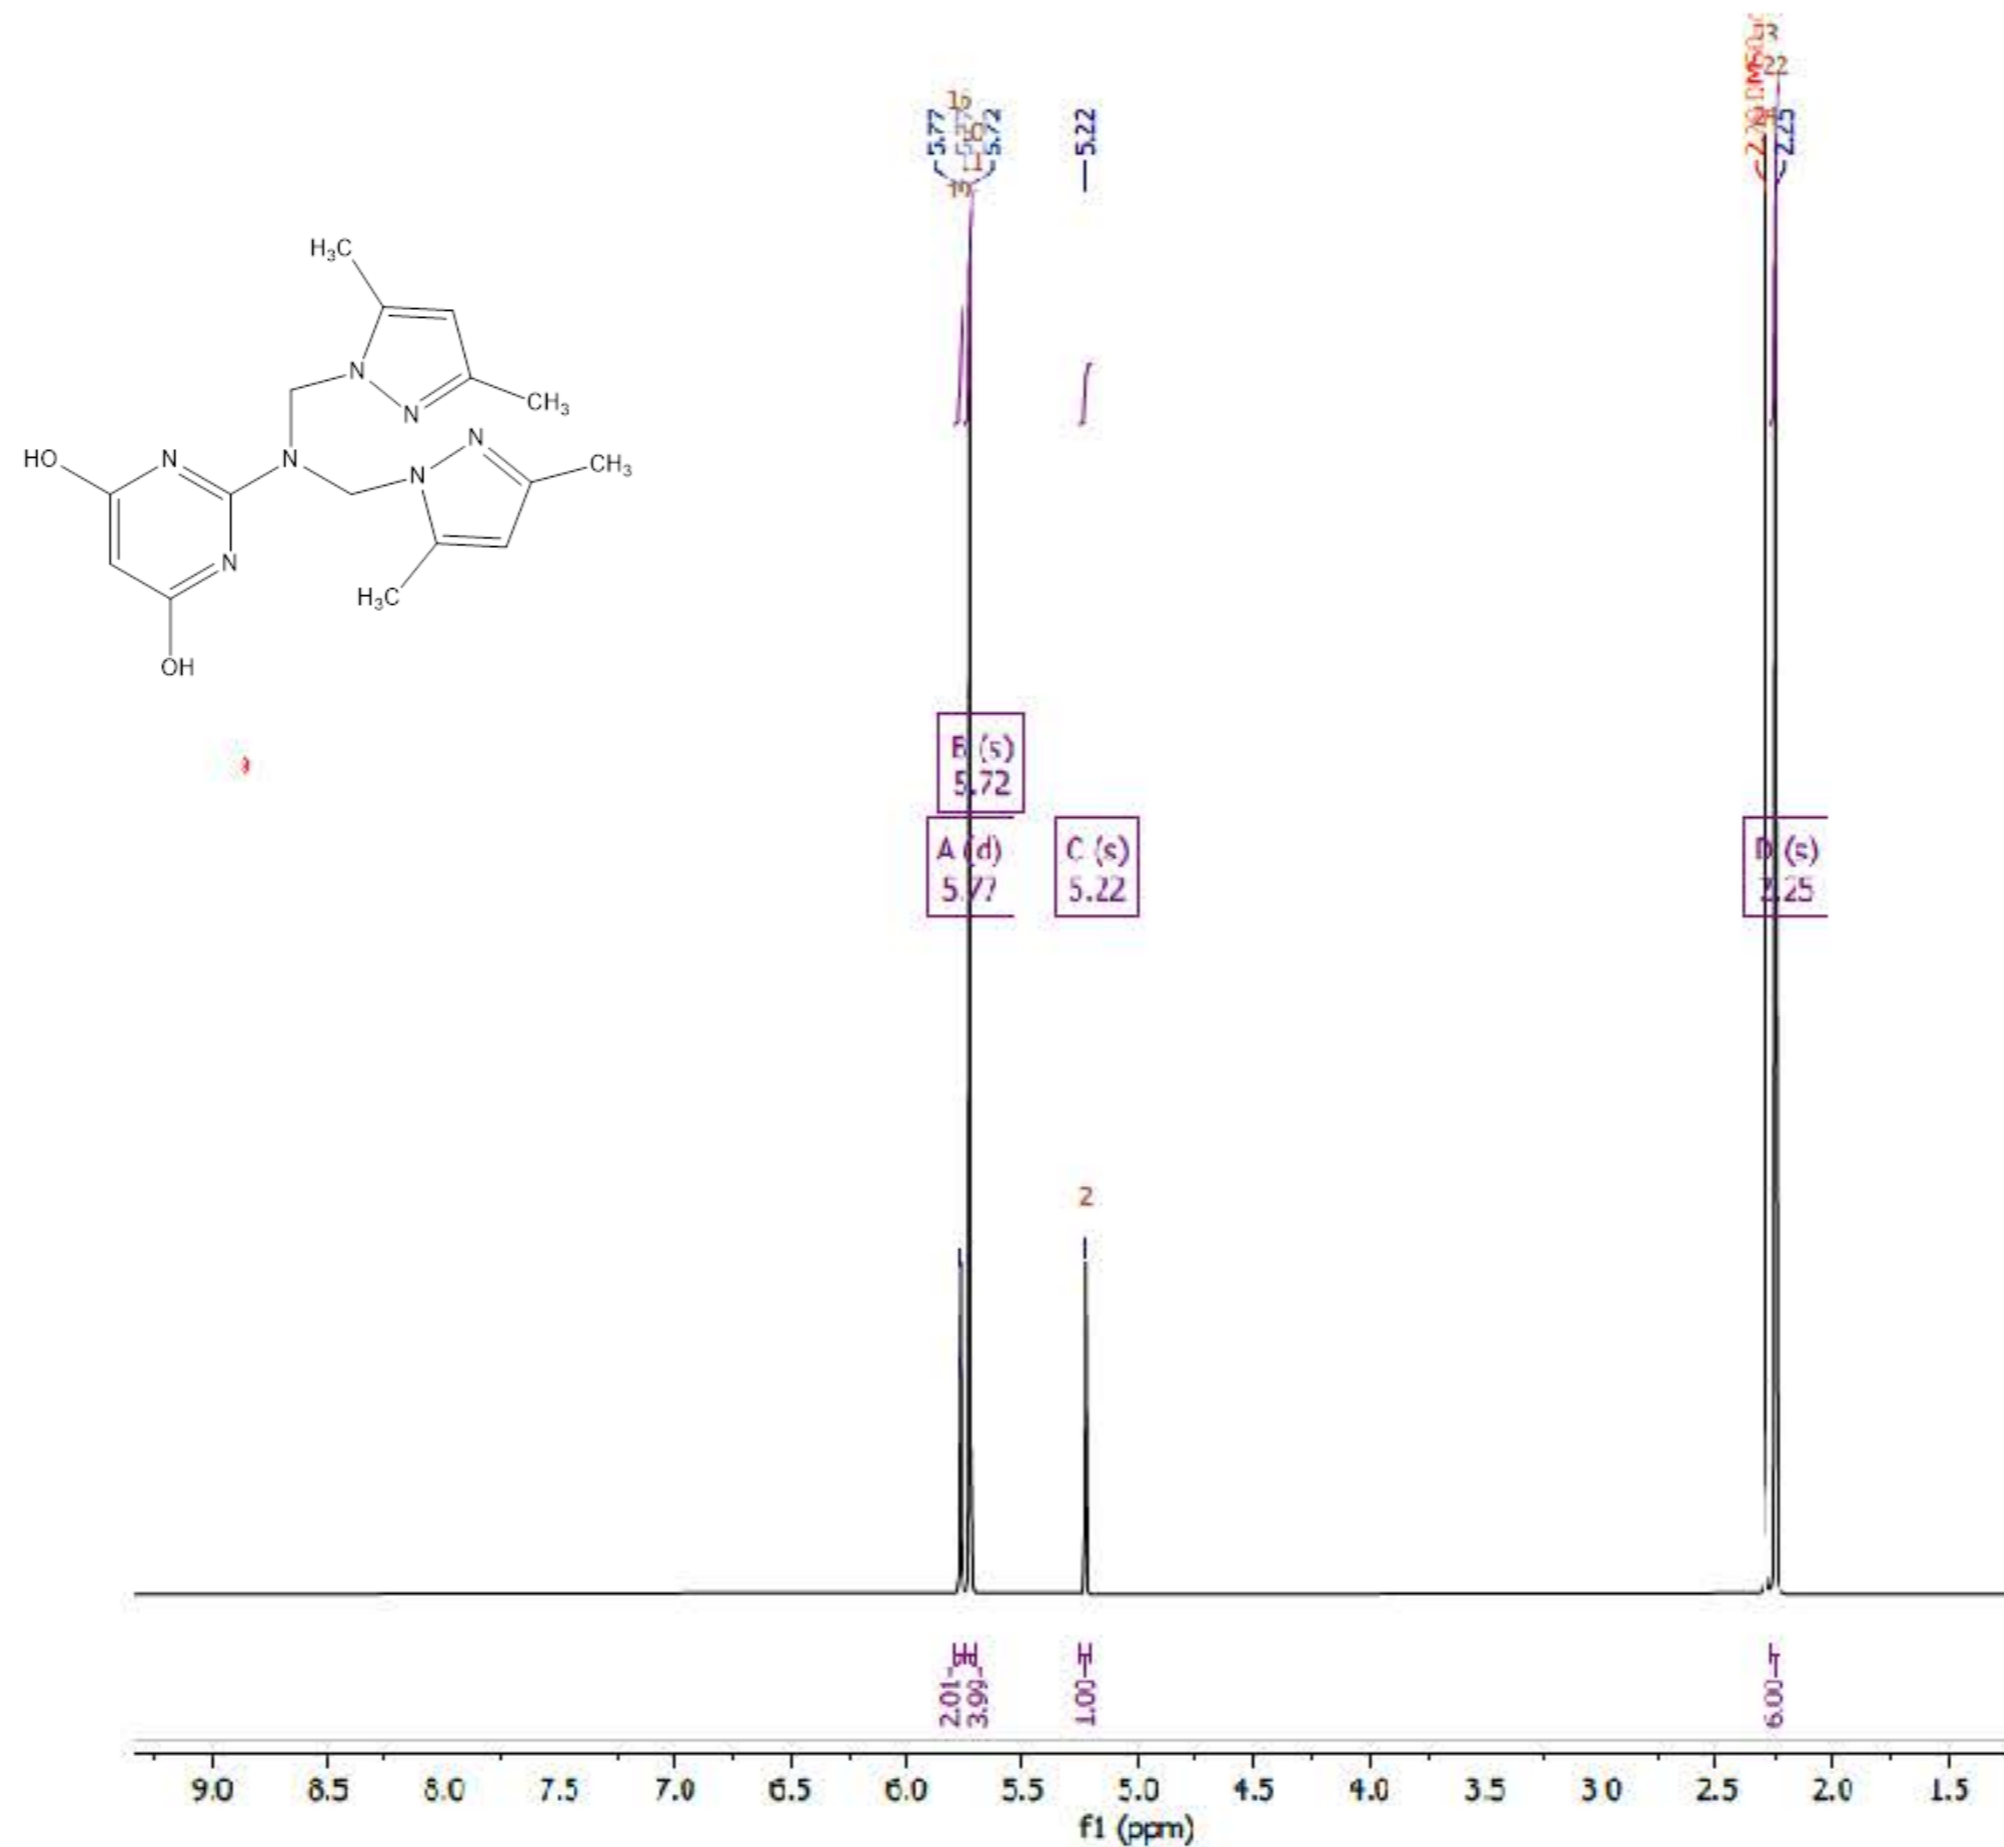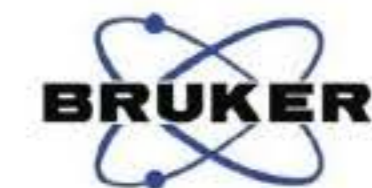

Current Data Parameters  
NAME D-rabea-D9-1H  
EXPNO 6  
PROCNO 1

F2 - Acquisition Parameters  
Date\_ 20190514  
Time 10.49  
INSTRUM spect  
PROBHD 5 mm PABBO BB/  
PULPROG zg30  
TD 65536  
SOLVENT DMSO  
NS 16  
DS 2  
SWH 8012.820 Hz  
FIDRES 0.122266 Hz  
AQ 4.0894465 sec  
RG 157.58  
DW 62.400 usec  
DE 6.50 usec  
TE 298.1 K  
D1 1.00000000 sec  
TD0 1

===== CHANNEL f1 =====  
SFO1 400.1324710 MHz  
NUC1 1H  
P1 15.00 usec  
PLW1 10.39999962 W

F2 - Processing parameters  
SI 65536  
SF 400.1300039 MHz  
WDW EM  
SSB 0  
LB 0.30 Hz  
GB 0  
PC 1.00

Compound 1

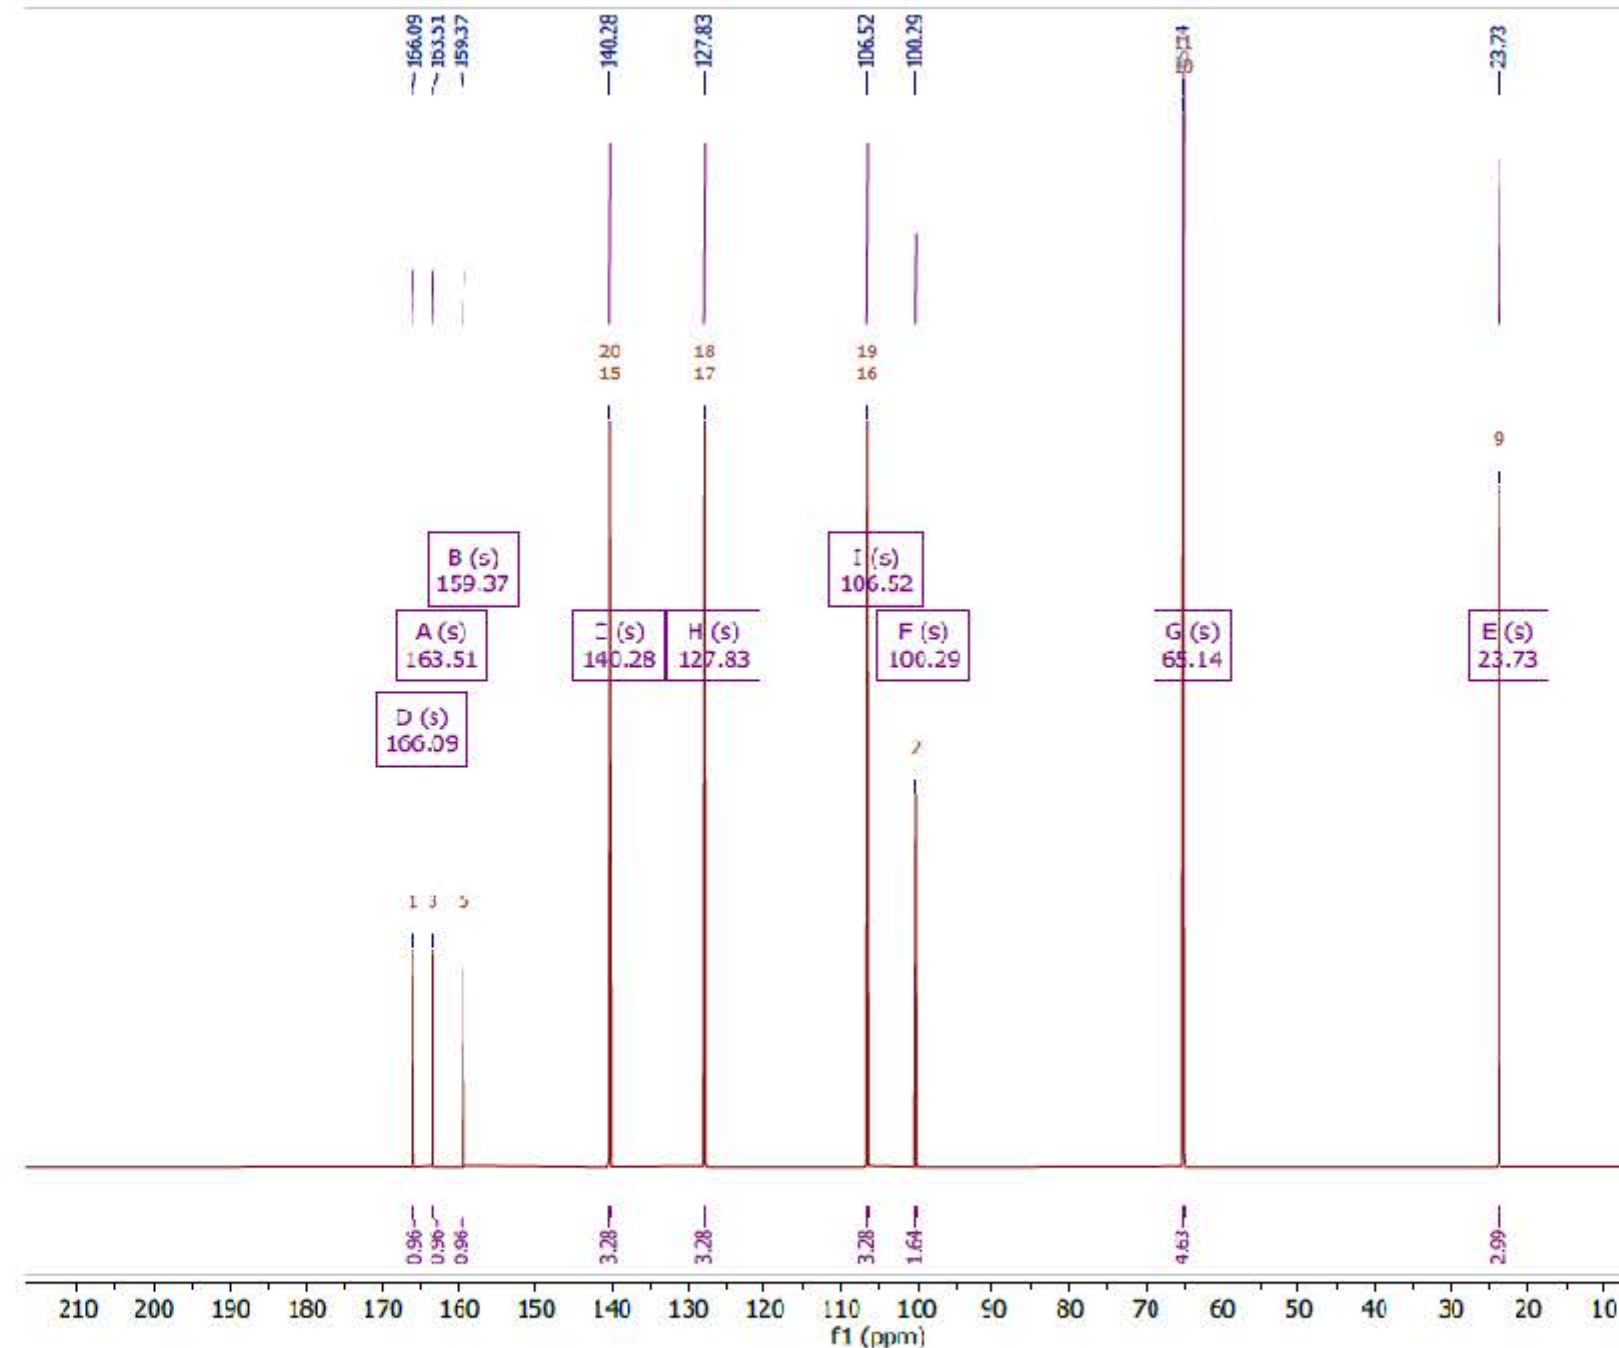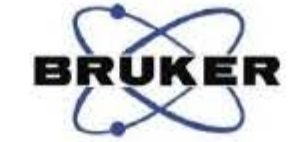

Current Data Parameters  
NAME D-rahea-D9-1H  
EXPNO 6  
PROCNO 1

F2 - Acquisition Parameters  
Date\_ 20190514  
Time 10.49  
INSTRUM spect  
PROBHD 5 mm PABBO BB/  
PULPROG zg30  
TD 65536  
SOLVENT DMSO  
NS 16  
DS 2  
SWH 8012.820 Hz  
FIDRES 0.122266 Hz  
AQ 4.0894465 sec  
RG 157.58  
DW 62.400 usec  
DE 6.50 usec  
TE 298.1 K  
D1 1.00000000 sec  
TDO 1

===== CHANNEL f1 =====  
SFO1 400.1324710 MHz  
NUC1 1H  
P1 15.00 usec  
PLW1 10.39999962 W

F2 - Processing parameters  
SI 65536  
SF 400.1300038 MHz  
WDW EM  
SSB 0  
LB 0.30 Hz  
GB 0  
PC 1.00

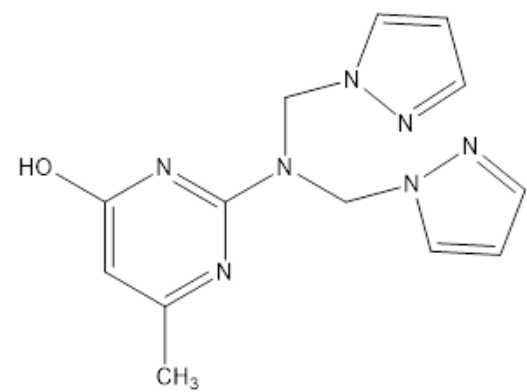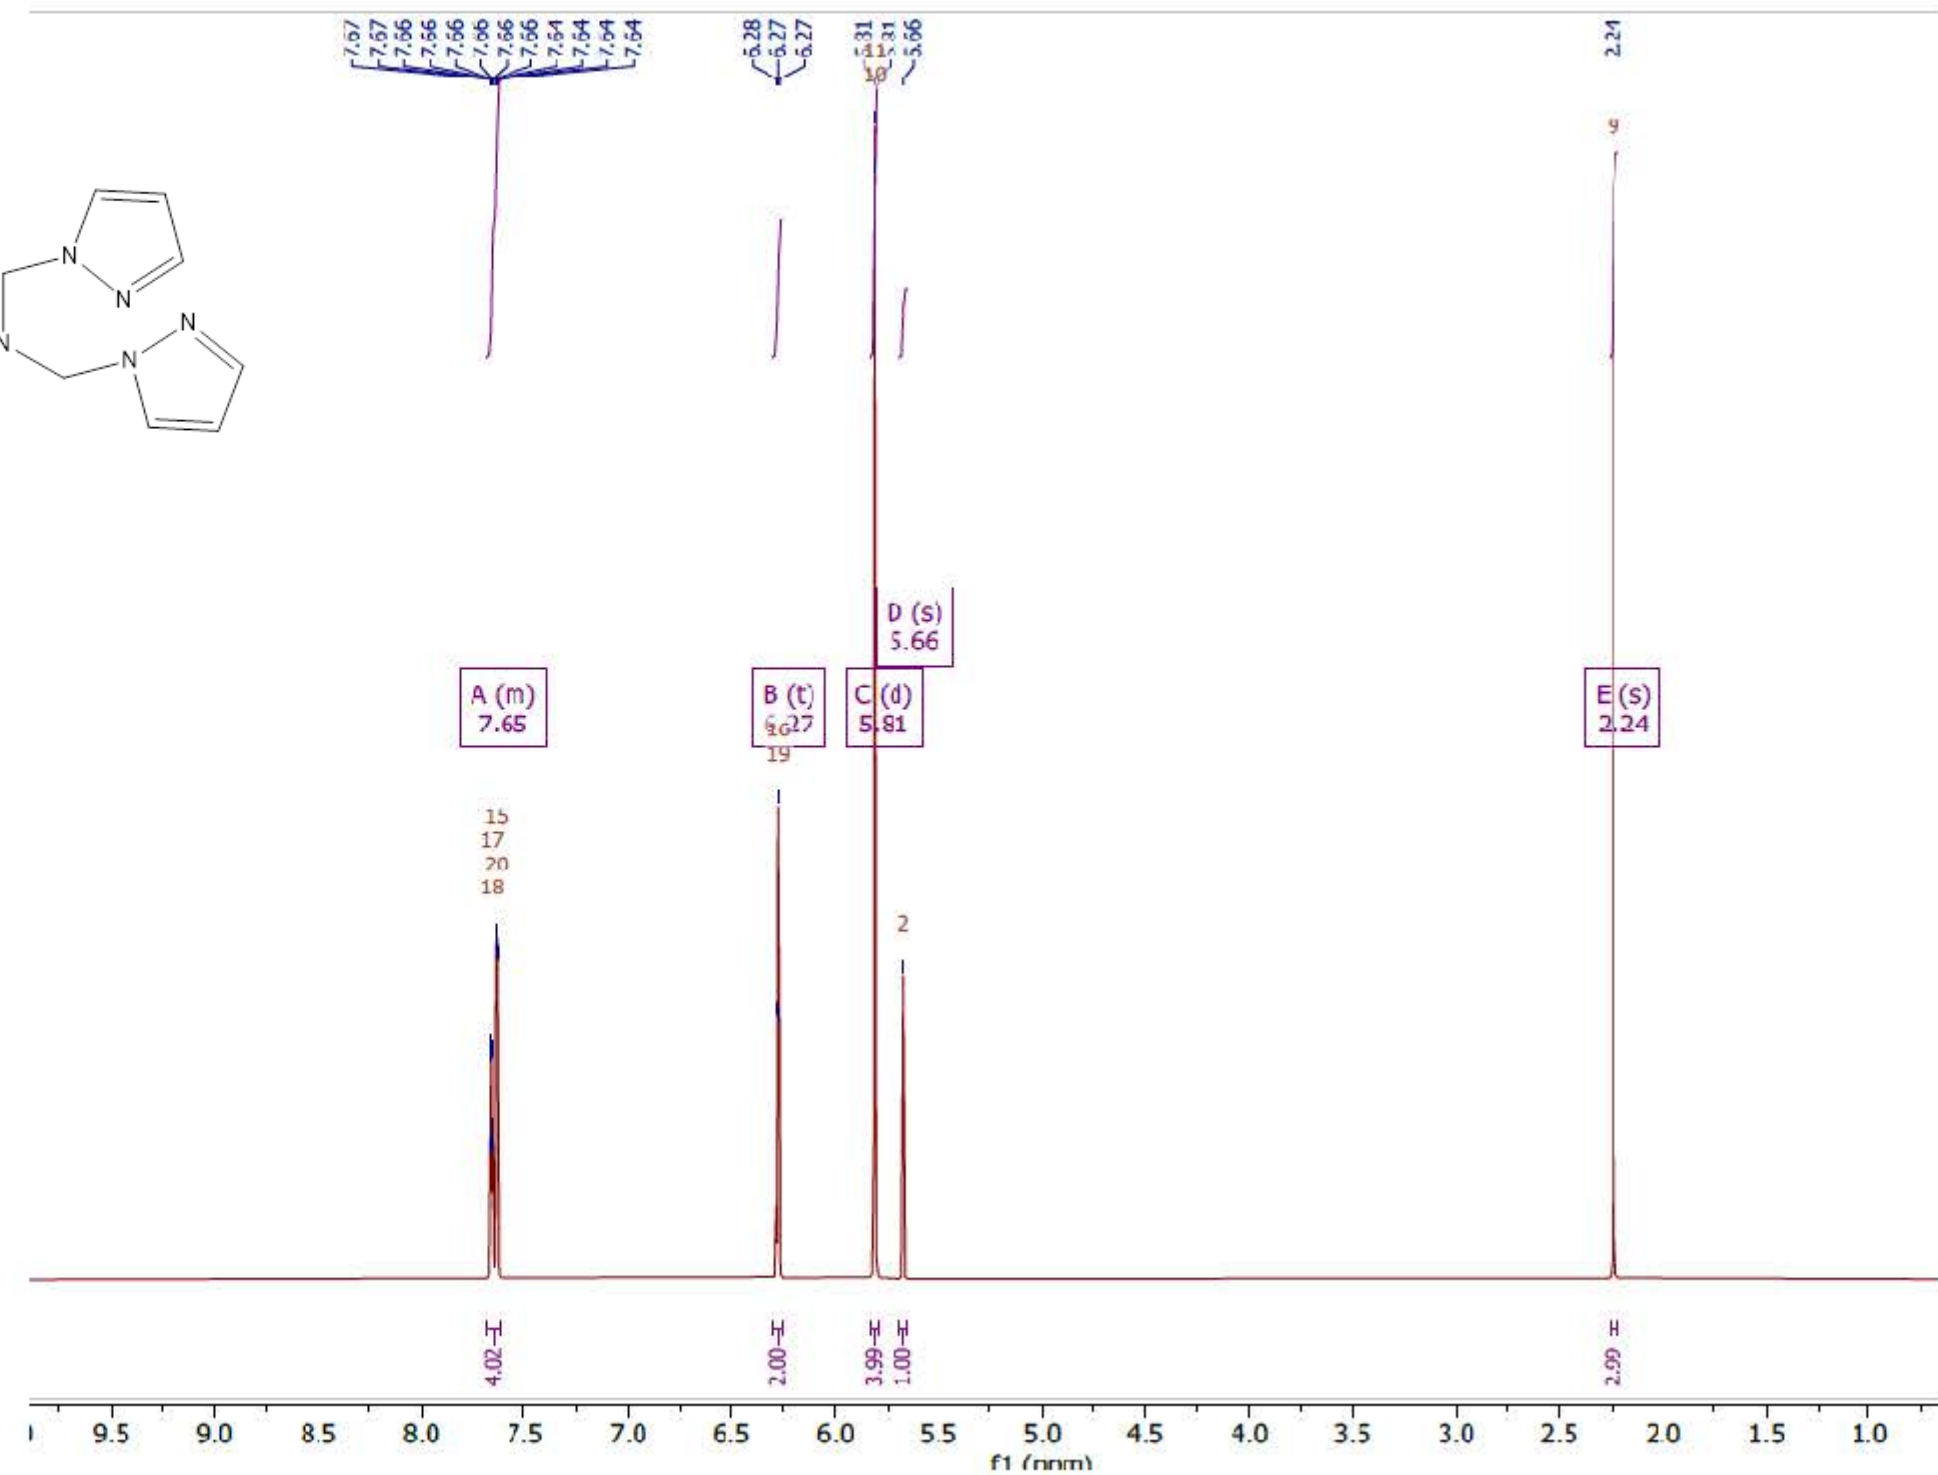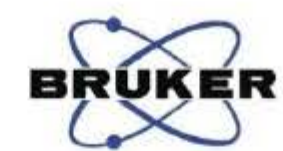

Current Data Parameters  
NAME D-rabea-D9-1H  
EXPNO 6  
PROCNO 1

F2 - Acquisition Parameters  
Date\_ 20190514  
Time 10.49  
INSTRUM spect  
PROBHD 5 mm PABBO BB/  
PULPROG zg30  
TD 65536  
SOLVENT DMSO  
NS 16  
DS 2  
SWH 8012.820 Hz  
FIDRES 0.122266 Hz  
AQ 4.0894465 sec  
RG 157.58  
DW 62.400 used  
DE 6.50 used  
TE 298.1 K  
D1 1.0000000 sec  
TDO 1

===== CHANNEL f1 =====  
SFO1 400.1324710 MHz  
NUC1 1H  
P1 15.00 used  
PLW1 10.39999962 W

F2 - Processing parameters  
SI 65536  
SF 400.130039 MHz  
WDW EM  
SSB 0  
LB 0.30 Hz  
GB 0  
PC 1.00

Compound 2

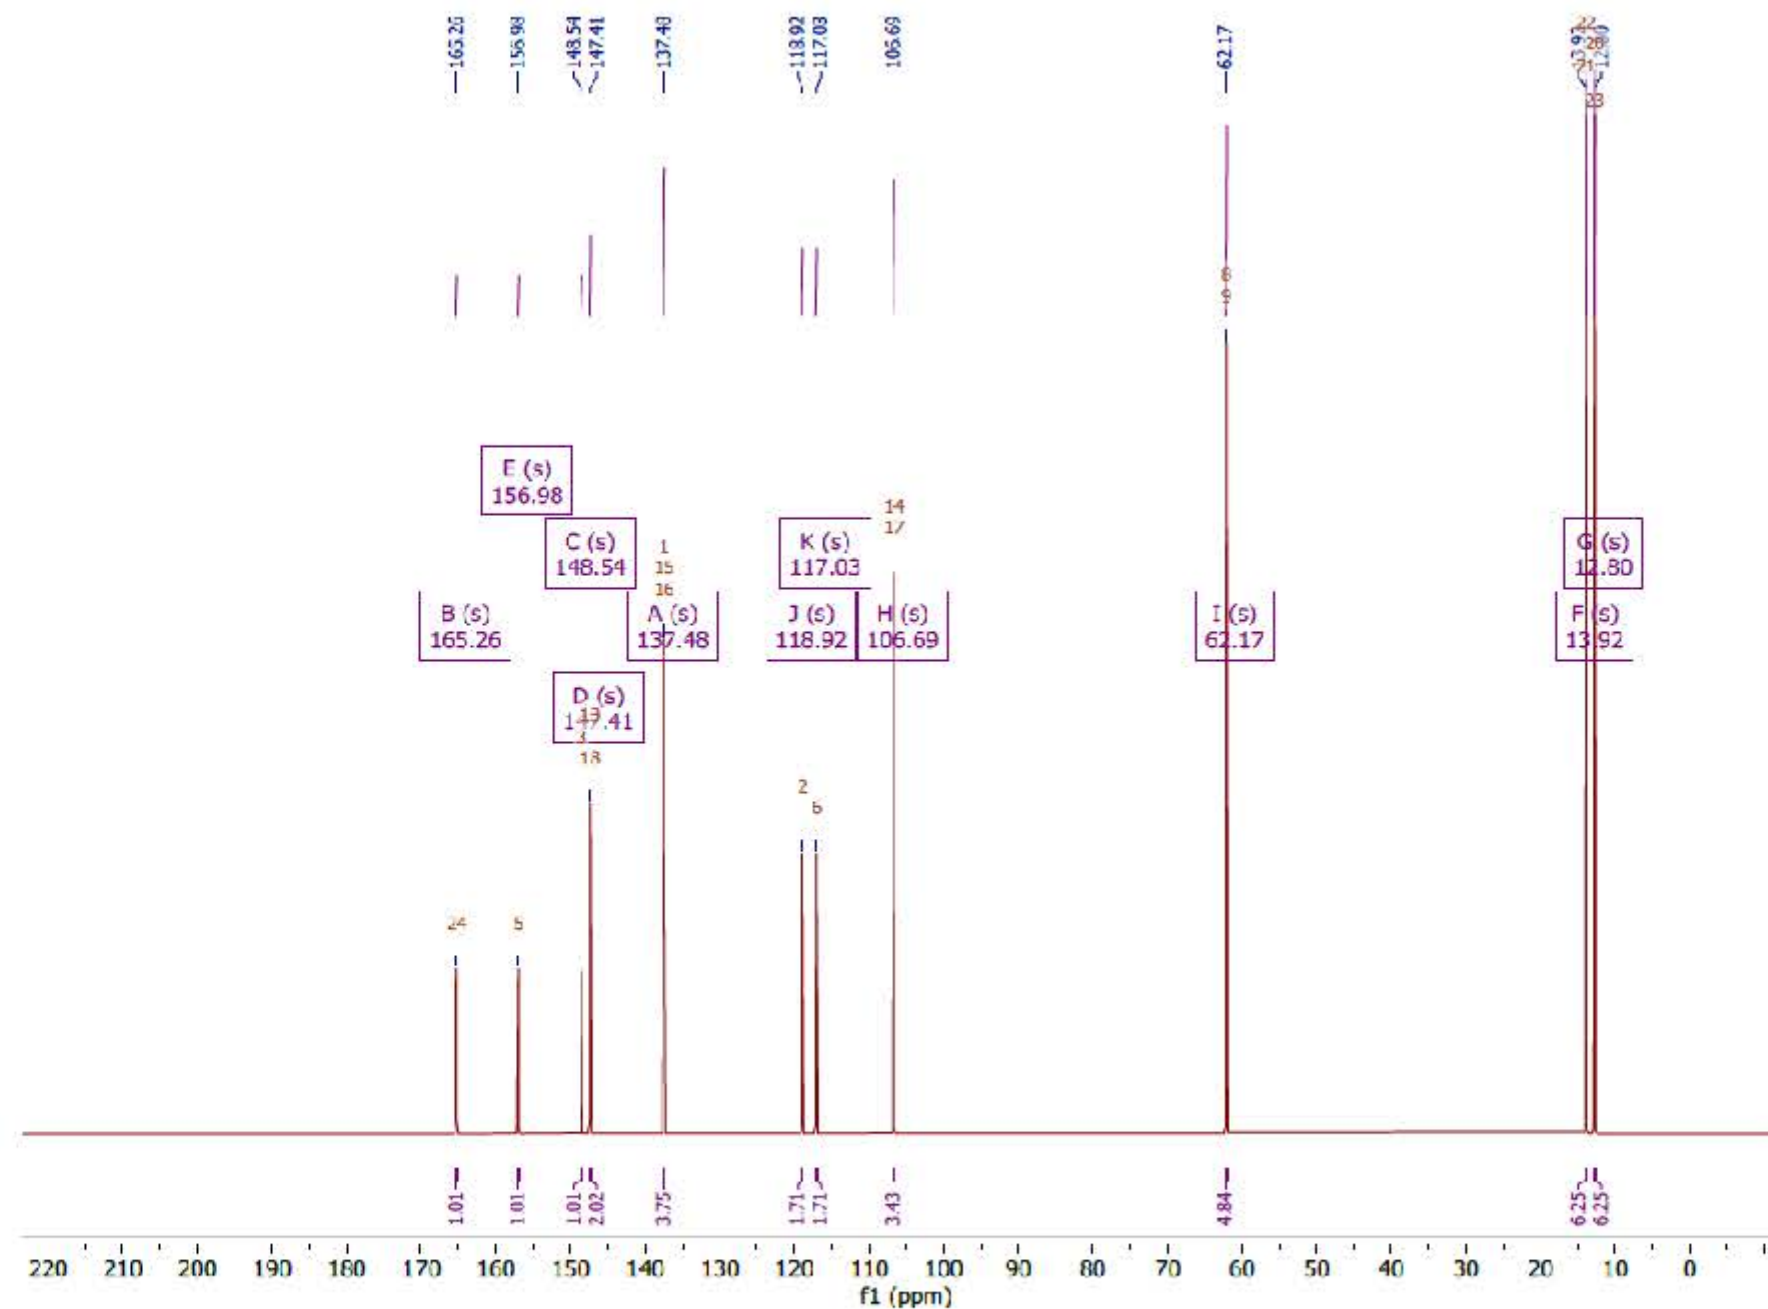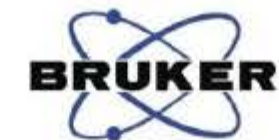

Current Data Parameters  
NAME D-rafael-D9-1H  
EXPNO 6  
PROCNO 1

F2 - Acquisition Parameters  
Date\_ 20190514  
Time 10.49  
INSTRUM spect  
PROBHD 5 mm PABBO BB/  
PULPROG zg30  
TD 65536  
SOLVENT DMSO  
NS 16  
DS 2  
SWH 8012.620 Hz  
FIDRES 0.122266 Hz  
AQ 4.0894465 sec  
RG 157.58  
DW 62.400 usec  
DE 6.50 usec  
TE 298.1 K  
D1 1.00000000 sec  
TDO 1

===== CHANNEL f1 =====  
SFO1 400.1324710 MHz  
NUC1 1H  
P1 15.00 usec  
PIW1 10.39999962 W

F2 - Processing parameters  
SI 65536  
SF 400.1300039 MHz  
WDW EM  
SSB 0  
LB 0.30 Hz  
GB 0  
PC 1.00

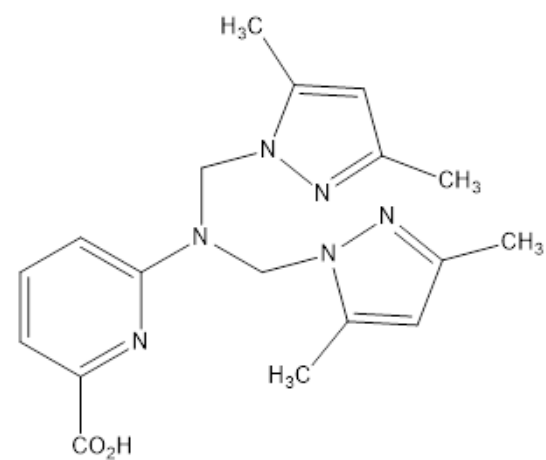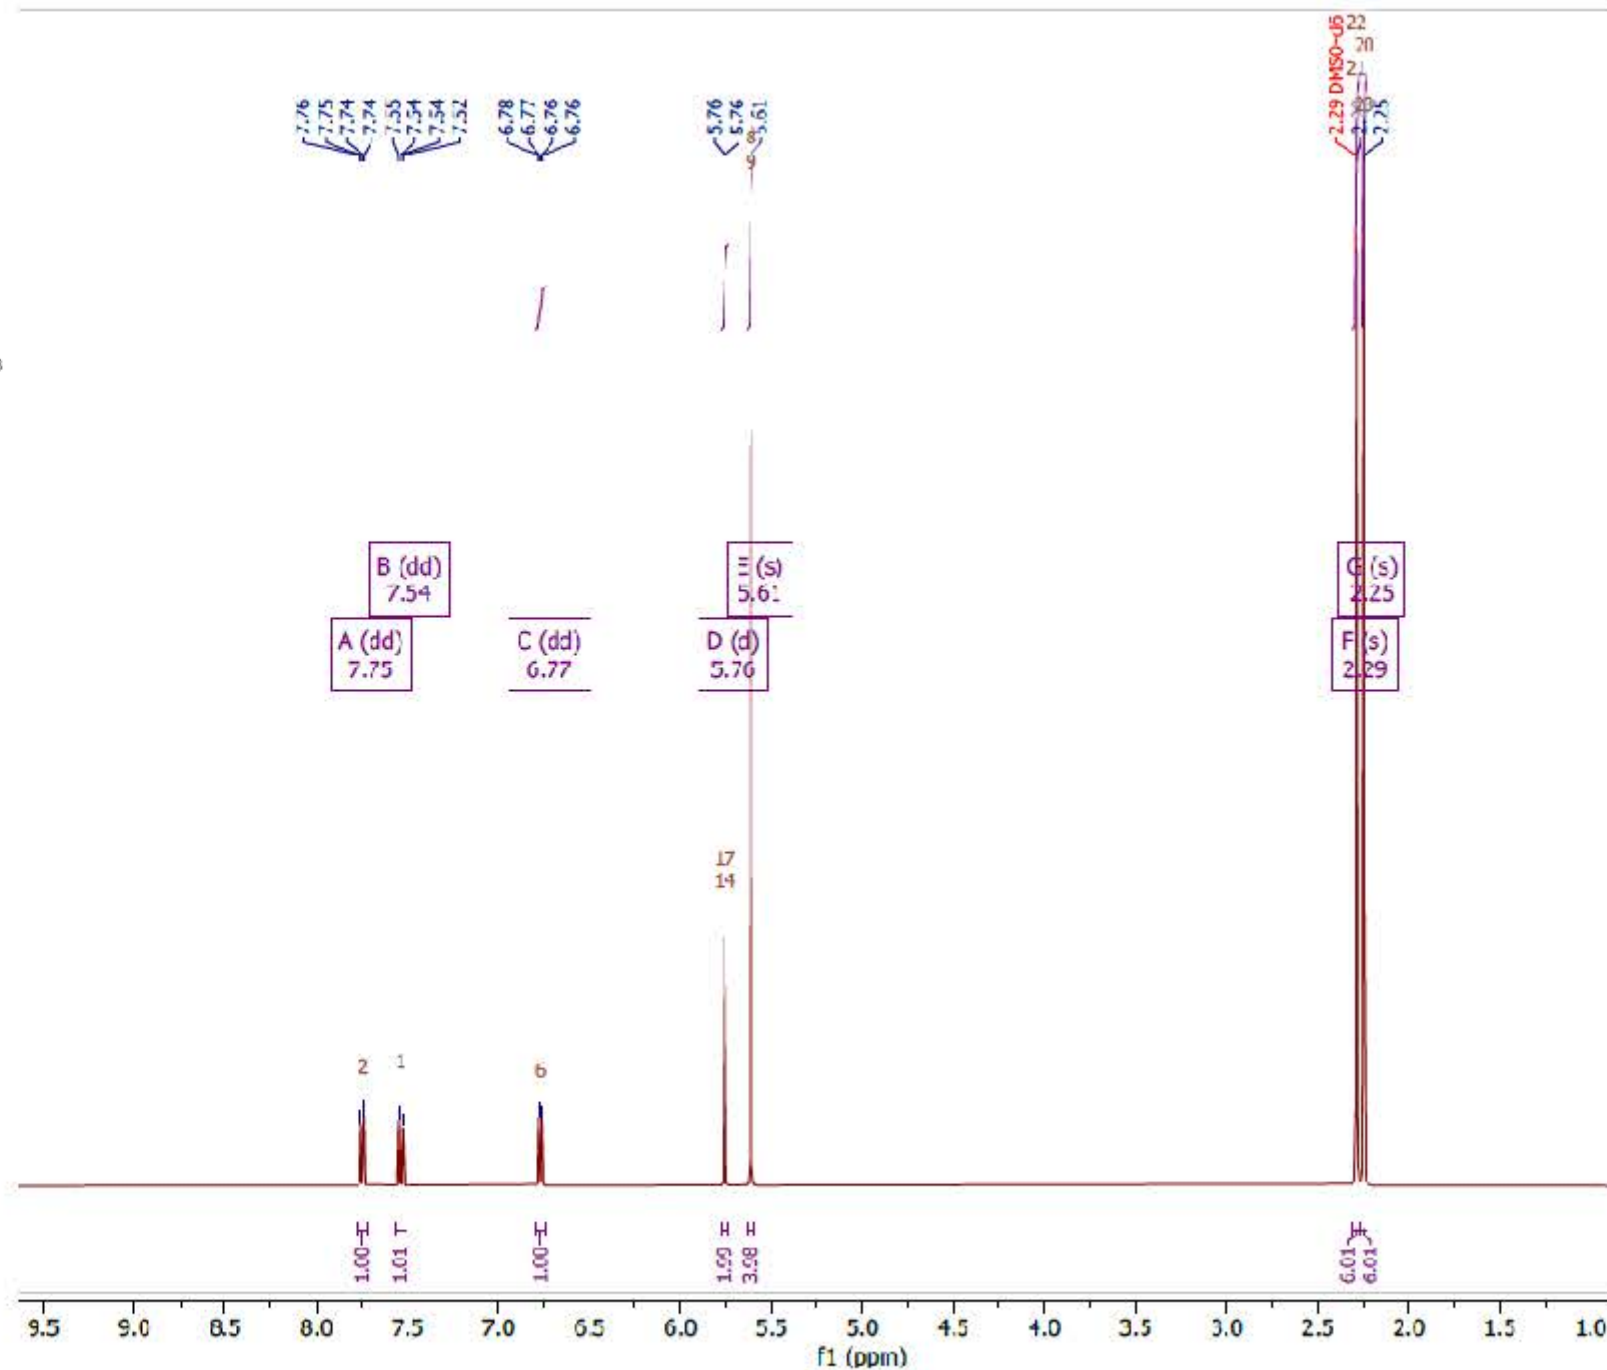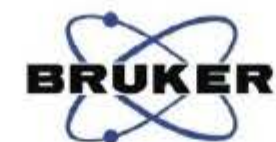

Current Data Parameters  
NAME D-rabea-D9-1B  
EXPNO 6  
PROCNO 1

F2 - Acquisition Parameters  
Date\_ 20190514  
Time 10.49  
INSTRUM spect  
PROBHD 5 mm PABBO BB/  
PULPROG zg30  
TD 65536  
SOLVENT DMSO  
NS 16  
DS 2  
SWH 8012.820 Hz  
FIDRES 0.122266 Hz  
AQ 4.0894465 sec  
RG 157.58  
DW 62.400 usec  
DE 6.50 usec  
TE 298.1 K  
d1 1.00000000 sec  
TDO 1

===== CHANNEL f1 =====  
SFO1 400.1324710 MHz  
NUC1 1H  
P1 15.00 usec  
PLW1 10.39999962 W

F2 - Processing parameters  
SI 65536  
SF 400.1300039 MHz  
WDW EM  
SSB 0  
LB 0.30 Hz  
GB 0  
PC 1.00

Compound 5

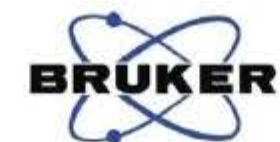

Current Data Parameters  
NAME D-rabea-D9-1H  
EXPNO 6  
PROCNO 1

F2 - Acquisition Parameters  
Date\_ 20190514  
Time 10.49  
INSTRUM spect  
PROBHD 5 mm PABBO BB/  
PULPROG zg30  
TD 65536  
SOLVENT DMSO  
NS 16  
DS 2  
SWH 8012.820 Hz  
FIDRES 0.122266 Hz  
AQ 4.0894465 sec  
RG 157.58  
DW 62.400 usec  
DE 6.50 usec  
TE 298.1 K  
D1 1.00000000 sec  
TDO 1

===== CHANNEL f1 =====  
SFO1 400.1324710 MHz  
NUC1 1H  
P1 15.00 usec  
PLW1 10.39999962 W

F2 - Processing parameters  
SI 65536  
SF 400.1300039 MHz  
WDW EM  
SSB 0  
LB 0.30 Hz  
GB 0  
PC 1.00

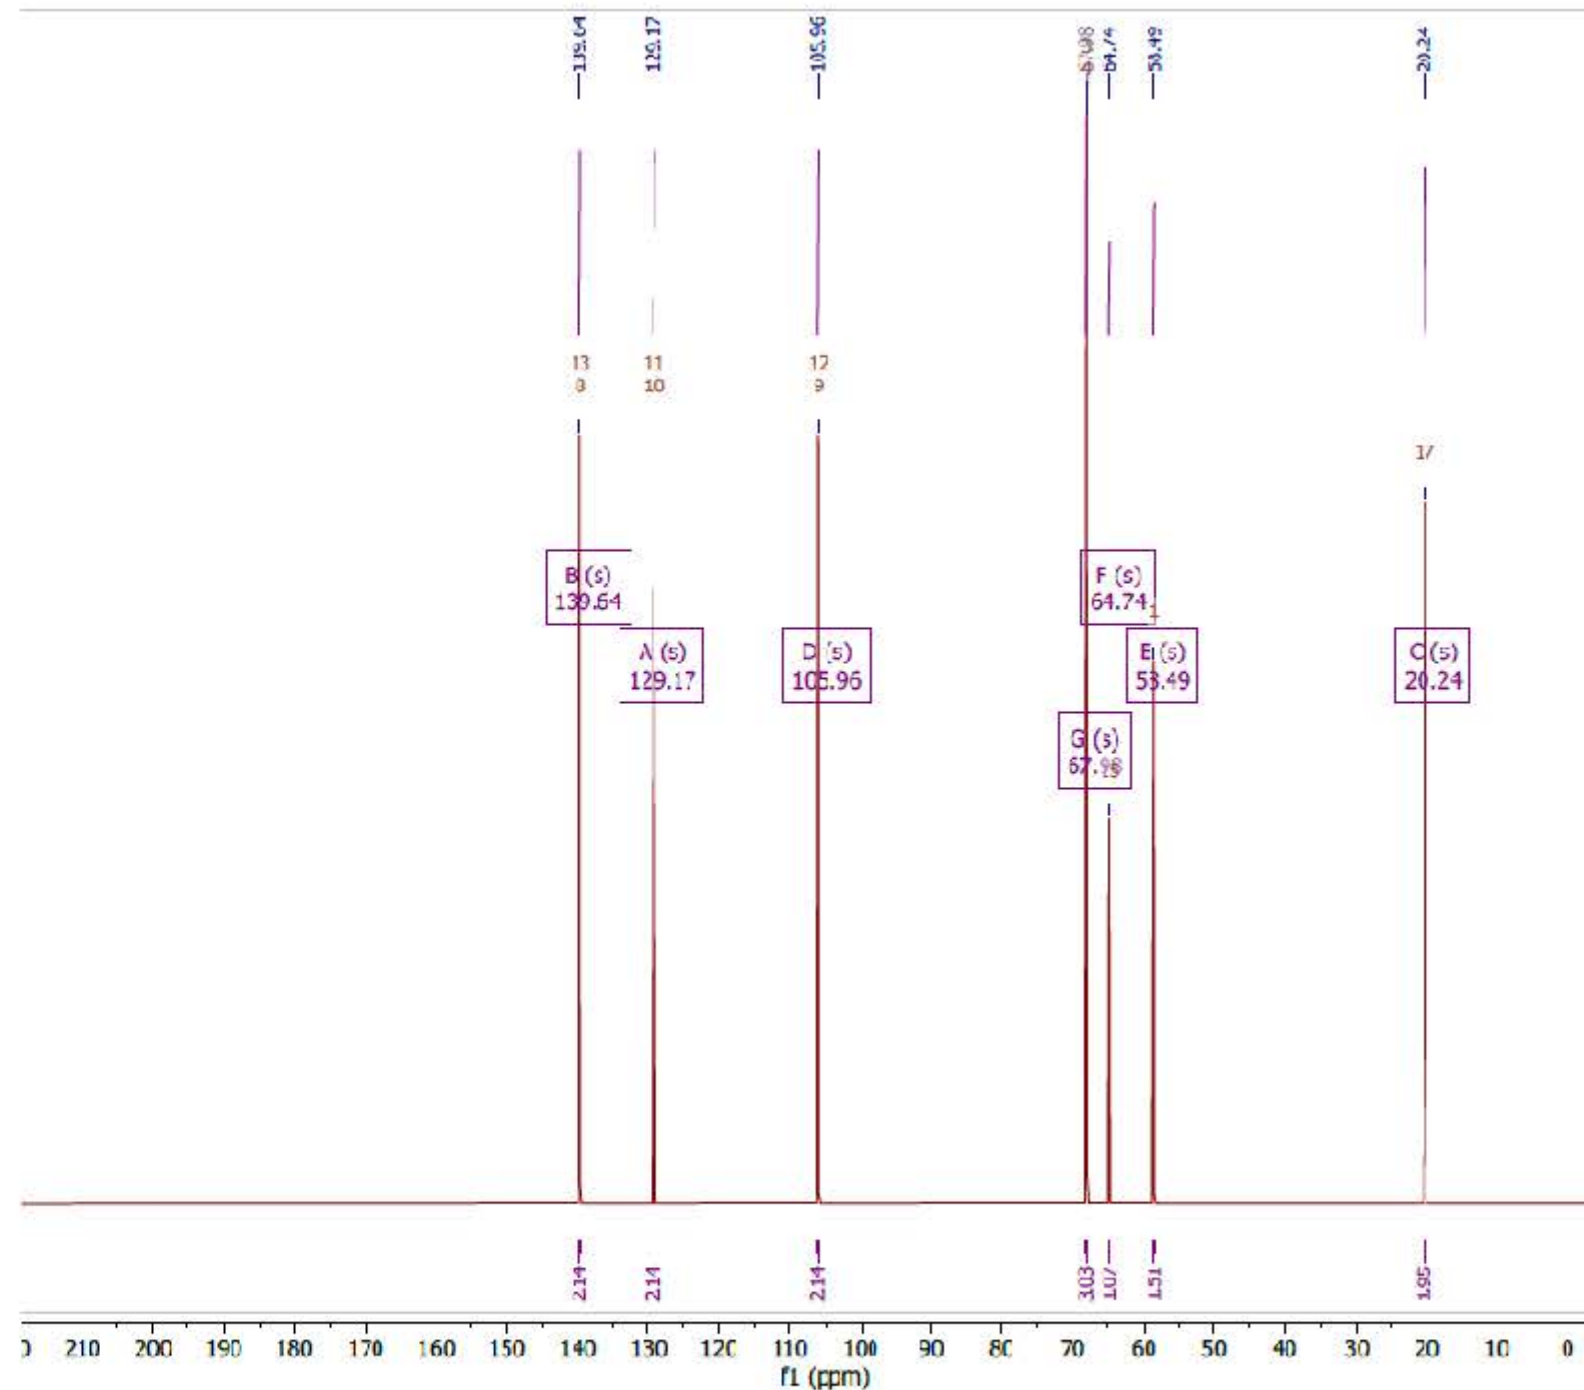

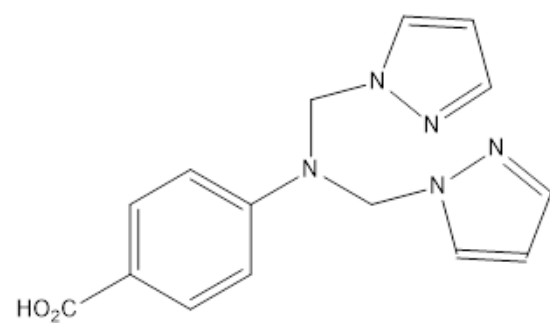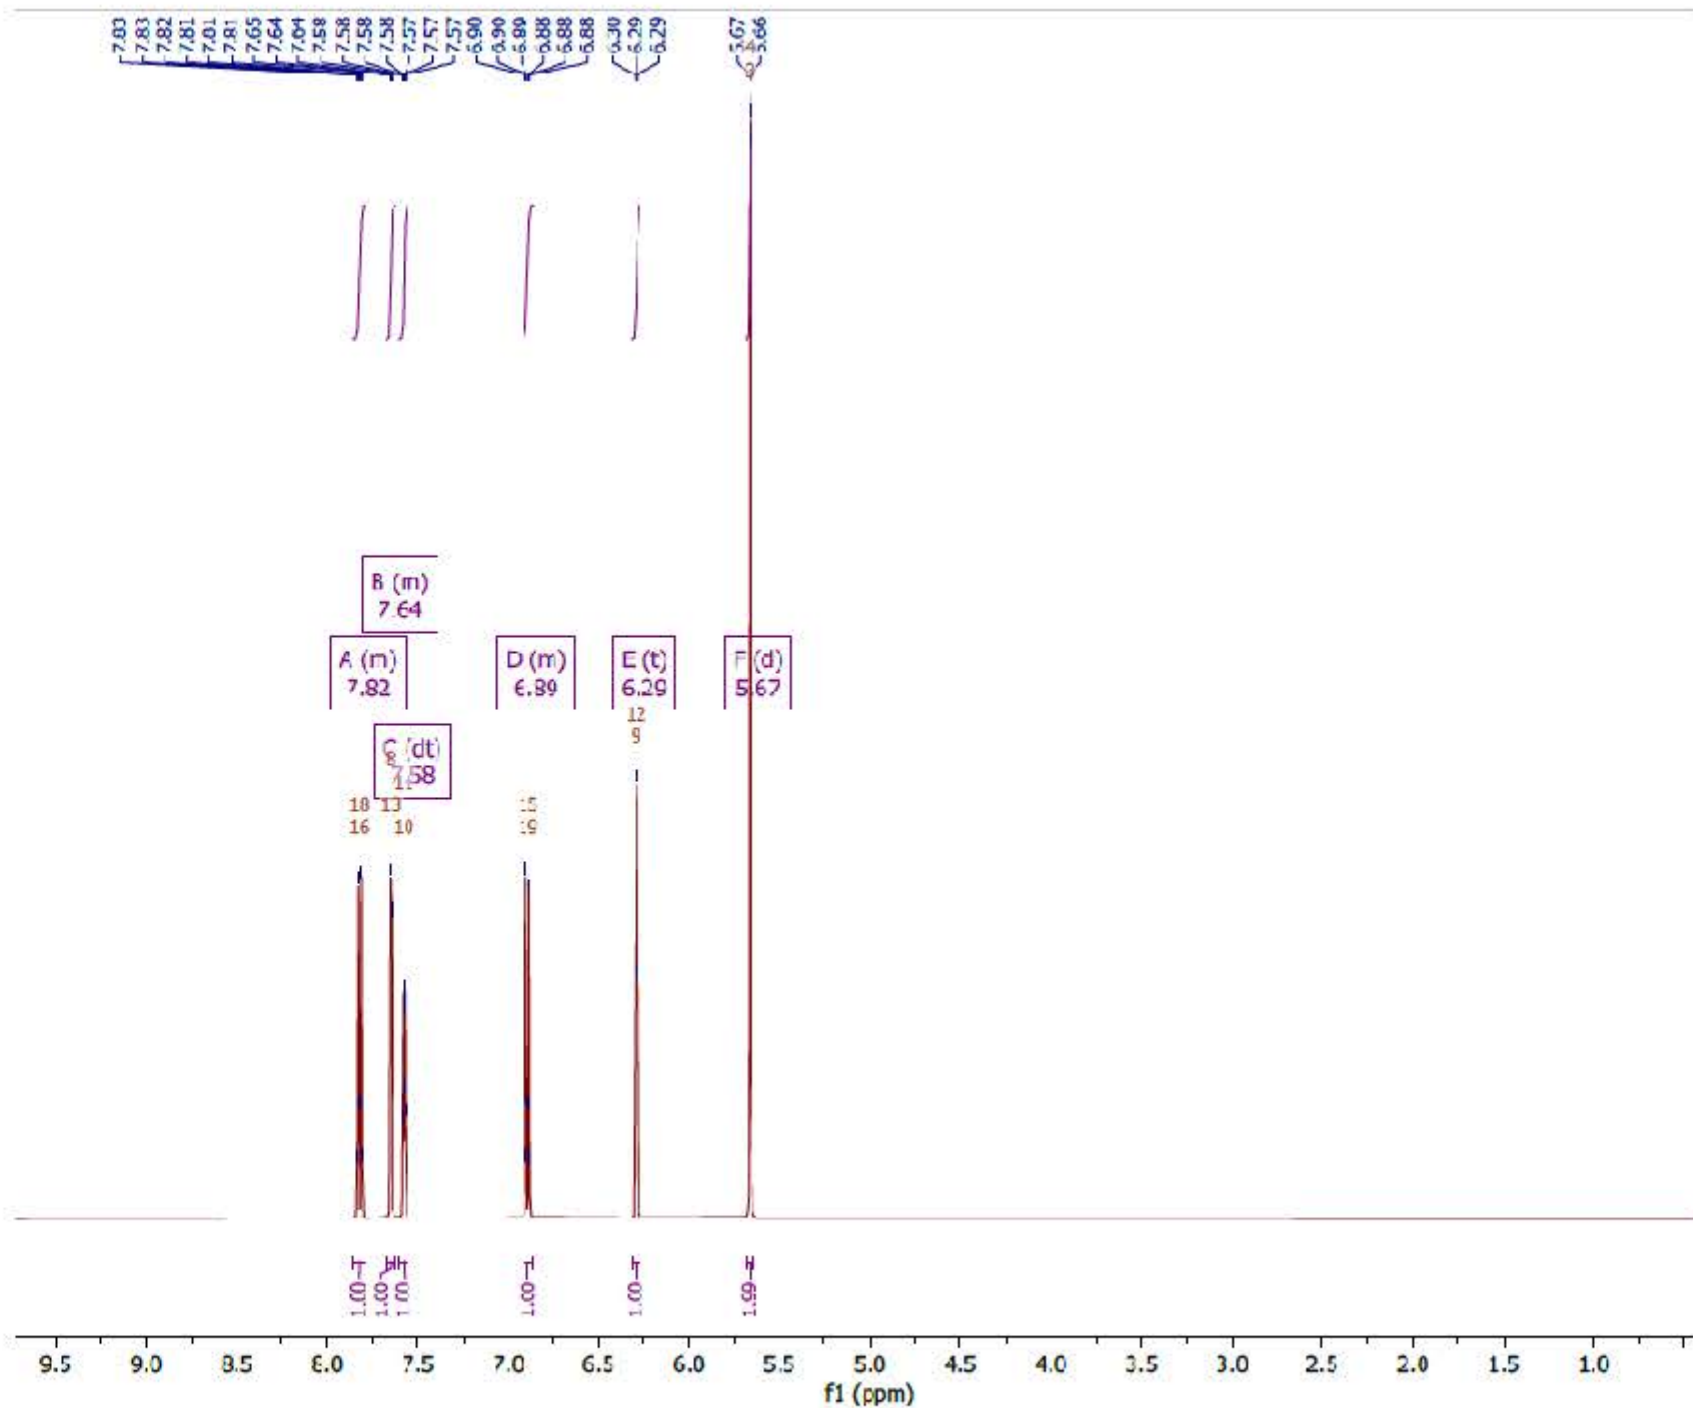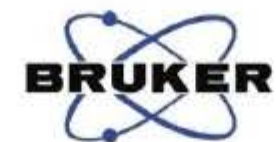

Current Data Parameters  
NAME D-rabea-D9-1H  
EXPNO 6  
PROCNO 1

F2 - Acquisition Parameters  
Date\_ 20190514  
Time 10.49  
INSTRUM spect  
PROBHD 5 mm PABBO BB/  
PULPROG zg30  
TD 65536  
SOLVENT DMSO  
NS 16  
DS 2  
SWH 8012.620 Hz  
FIDRES 0.122266 Hz  
AQ 4.0894465 sec  
RG 157.58  
DW 62.400 usec  
DE 6.50 usec  
TE 298.1 K  
D1 1.00000000 sec  
TDO 1

===== CHANNEL f1 =====  
SFO1 400.1324710 MHz  
NUC1 1H  
P1 15.00 usec  
PLW1 10.39999962 W

F2 - Processing parameters  
SI 65536  
SF 400.1300039 MHz  
WDW EM  
SSB 0  
LB 0.30 Hz  
GB 0  
PC 1.00

Compound 15

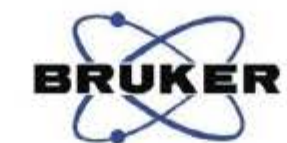

# Current Data Parameters

NAME D-rabea-D9-1B  
EXPNO 6  
PROCNO 1

# F2 - Acquisition Parameters

Date\_ 20190514  
Time 10.49  
INSTRUM spect  
PROBHD 5 mm PABBO BB/  
PULPROG zg30  
TD 65536  
SOLVENT DMSO  
NS 16  
DS 2  
SWH 8012.820 Hz  
FIDRES 0.122266 Hz  
AQ 4.0894465 sec  
RG 157.58  
DW 62.400 usec  
DE 6.50 usec  
TE 298.1 K  
D1 1.00000000 sec  
TDO 1

# ===== CHANNEL f1 =====

SFO1 400.1324710 MHz  
NUC1 1H  
P1 15.00 usec  
PLW1 10.39999962 W

# F2 - Processing parameters

SI 65536  
SF 400.1300039 MHz  
WDW EM  
SSB 0  
LB 0.30 Hz  
GB 0  
PC 1.00

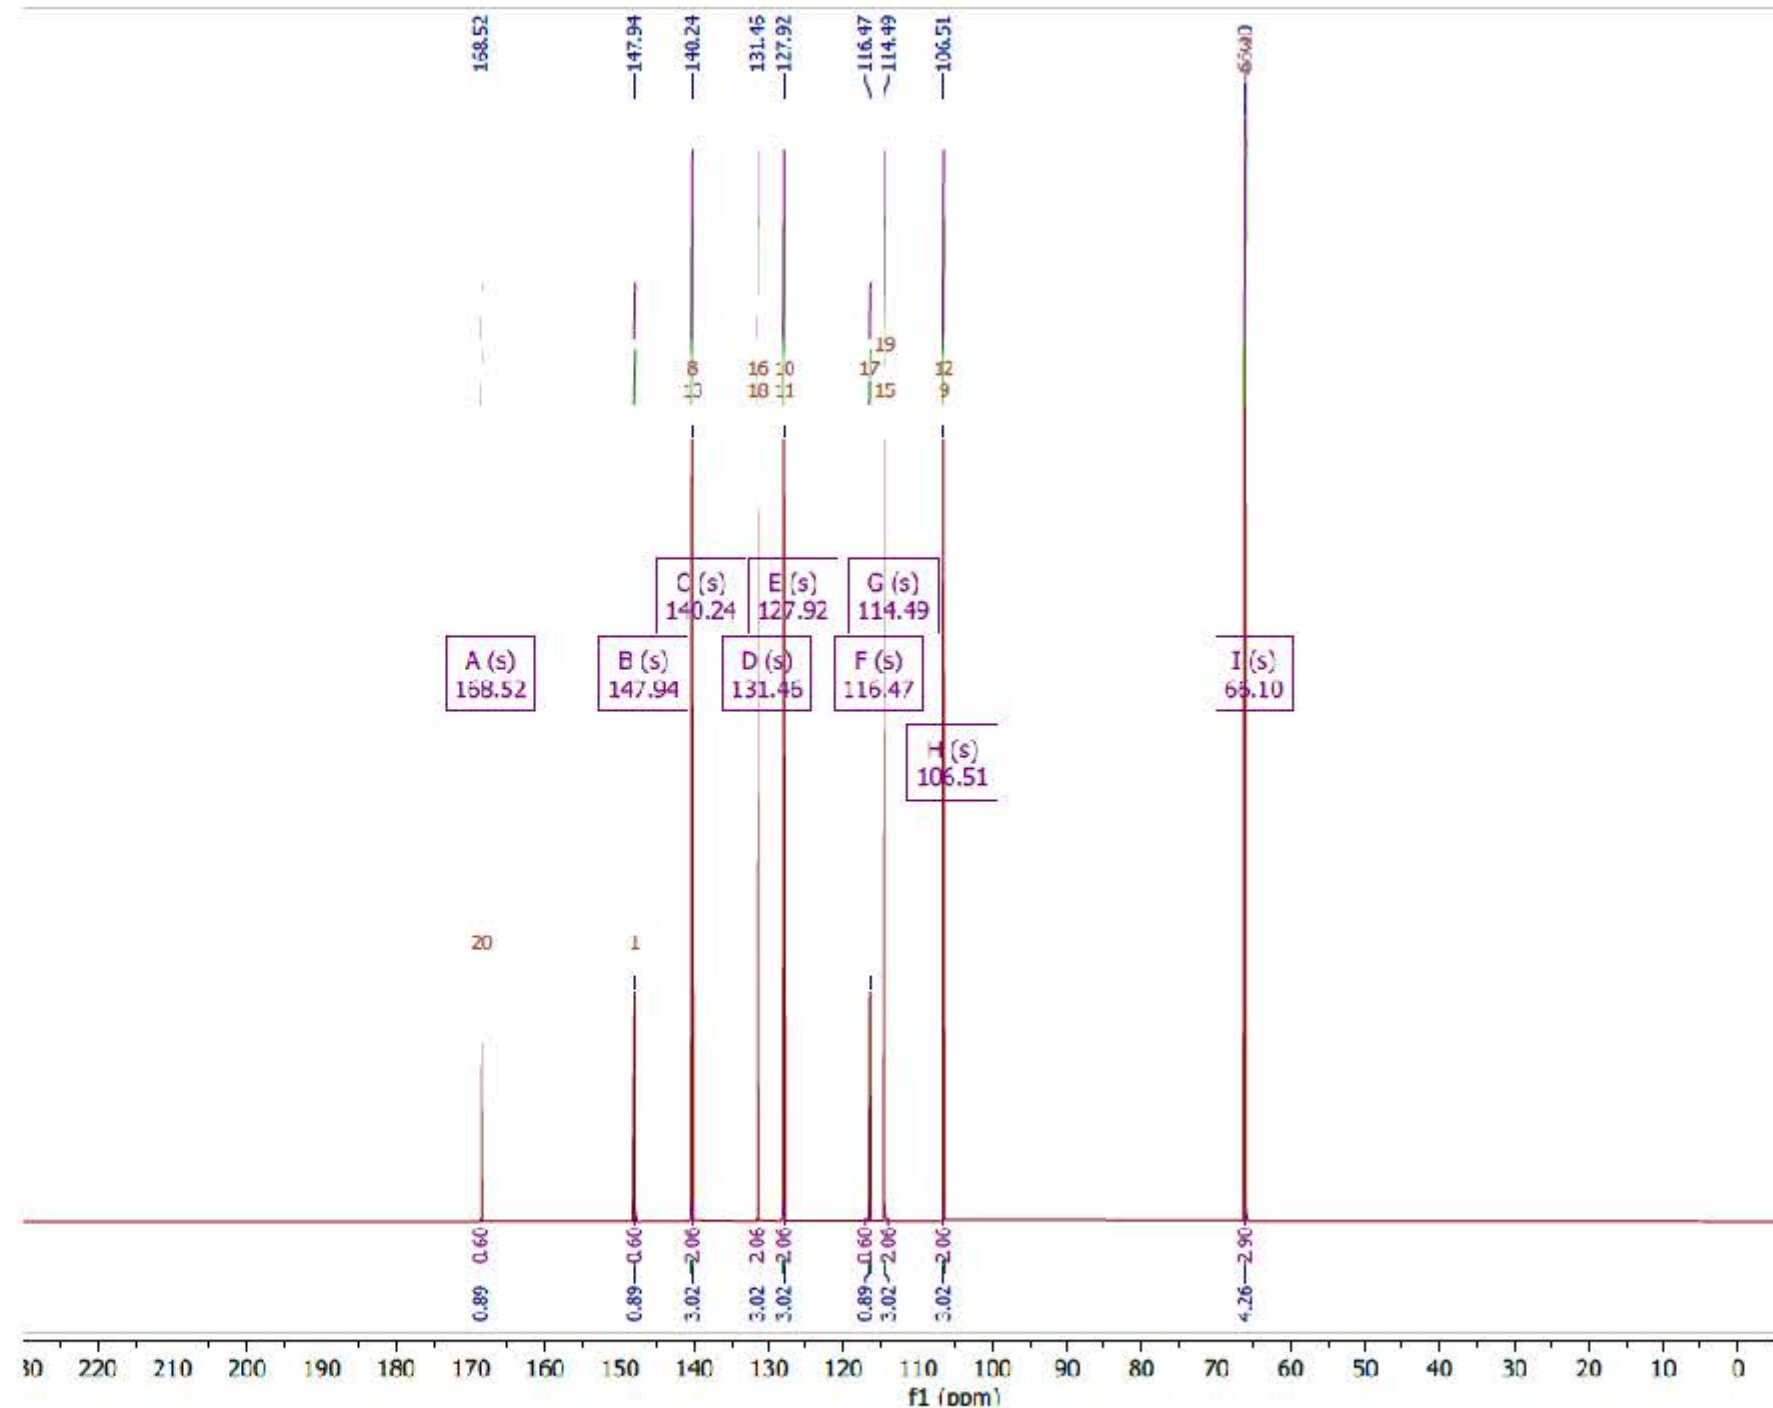

Supplement: s1 [file s1]
