# Supplementary material for: New N-Alkylated Heterocyclic Compounds as Prospective NDM1 Inhibitors: Investigation of In Vitro and In Silico Properties
Source: MDPI journal article supplement (doi:10.3390/ph15070803), 2022-06-28
Supplement: s1 [file s1]

**Table S1.** Blind docking/virtual screening as Perl configuration and GRID box parameters.

|                                |                                                                                                                                                                                                                                                                                                                                                                                                                                                                             |
|--------------------------------|-----------------------------------------------------------------------------------------------------------------------------------------------------------------------------------------------------------------------------------------------------------------------------------------------------------------------------------------------------------------------------------------------------------------------------------------------------------------------------|
| <b>Perl<br/>configuration</b>  | <pre>#!/usr/bin/perl print "Ligand_file: \t"; \$ligfile=&lt;STDIN&gt;; chomp \$ligfile; open (FH,\$ligfile)   die "Cannot open file\n"; @arr_file=&lt;FH&gt;; for(\$i=0;\$i&lt;@arr_file;\$i++) {     print "@arr_file[\$i]\n";     @name=split(/\.\/,@arr_file[\$i]); } for(\$i=0;\$i&lt;@arr_file;\$i++) {     chomp @arr_file[\$i];     print "@arr_file[\$i]\n";     system("vina.exe -config conf_vs.txt -ligand @arr_file[\$i] -log @arr_file[\$i]_log.log"); }</pre> |
| <b>GRID box<br/>parameters</b> | <ul style="list-style-type: none"> <li>• <b>center_x</b> = 2.863, <b>center_y</b> = 33.906, <b>center_z</b> = 116.625</li> <li>• <b>size_x</b> = 54, <b>size_y</b> = 86, <b>size_z</b> = 54</li> <li>• <b>num_modes</b> = 10; <b>energy_range</b> = 4</li> </ul>                                                                                                                                                                                                            |
